# Supplementary material
Source: HighWire-hosted journal article supplement (https://jnm.snmjournals.org/highwire/filestream/95482/field_highwire_adjunct_files/0/215418_Supplemental_Data.pdf)
Supplement: 215418_Supplemental_Data.pdf [file 215418_Supplemental_Data.pdf]

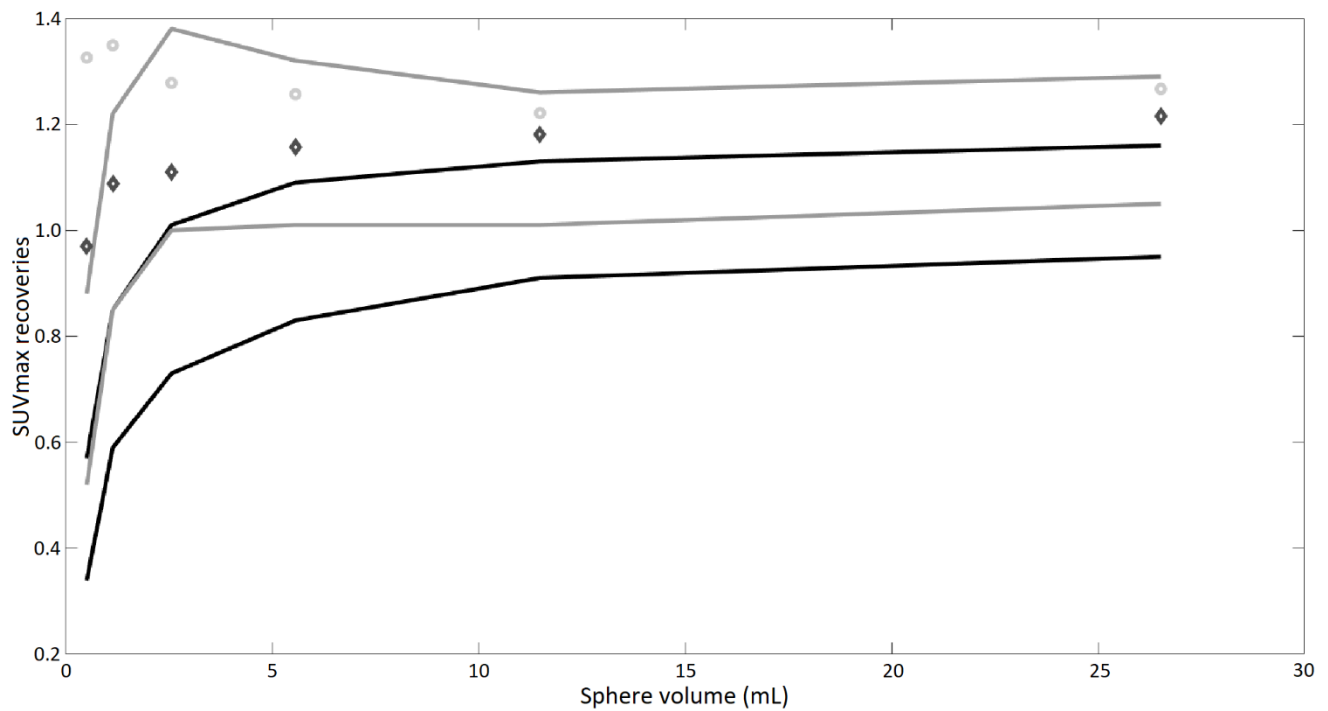

Supplemental Figure 1 – SUVmax recovery coefficients as function of the sphere sizes in the NEMA NU 2 IQ phantom using 4 iterations, 5 subsets, applying TOF, no filter (nonEARL), with (circle) and without (diamond) PSF resolution modelling. For comparison, the upper- and lower limits of SUVmax recoveries as described by current EARL guidelines (EARL1 (solid black lines)) and EARL 2019 guidelines (EARL2 (solid grey lines)) have been included.

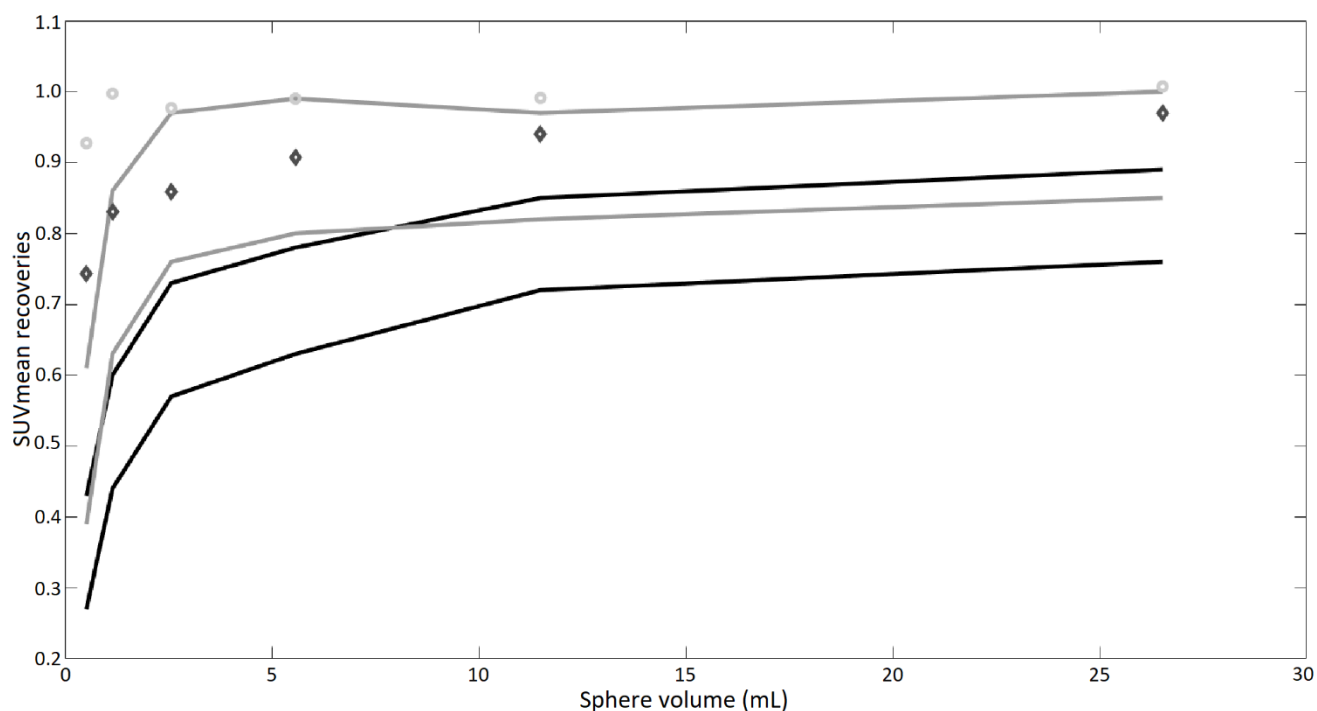

Supplemental Figure 2 – SUVmean recovery coefficients as function of the sphere sizes in the NEMA NU 2 IQ phantom using 4 iterations, 5 subsets, applying TOF, no filter (nonEARL), with (circle) and without (diamond) PSF resolution modelling. For comparison, the upper- and lower limits of SUVmean recoveries as described by current EARL guidelines (EARL1 (solid black line)) and EARL 2019 guidelines (EARL2 solid grey line)) have been included.

Table 1 – Current EANM recommendations for FDG administration (20) describe for a patient of 75 kg in weight for the Vision with a bed overlap of 49.7% to administer 7 MBq·min·bed<sup>-1</sup>·kg<sup>-1</sup>. This equals 3.5 MBq·kg for scanning 2 min per bed position and 2.33 MBq·kg for scanning 3 min per bed position. Following the standard operating procedure “EARL procedure for assessing PET/CT system specific patient FDG activity preparations for quantitative FDG PET/CT studies” (23) results were obtained for 15, 30, 60, 120, and 300 s of scan time, respectively, using the EARL1 reconstruction with 4 iterations, 5 subsets, a matrix size of 220, applying PSF and TOF, and a Gaussian filter of 7 mm. Results indicated in green represent Coefficient of Variance values of <15%. The corresponding activity dose and scan duration provide a first insight in applicable activity dose and scan duration for clinical practice.

Translating this to continuous bed motion (Flow) scanning versus step-and-shoot for a typical whole body scan of ~105 cm: with an axial FOV of 26.3 cm and a bed overlap of 49.7%, 105 cm means 8 total beds. 8 total beds in 1 min per bed position step-and-shoot acquisition (see \*) corresponds to 8 minutes scan duration. Conversion of the above mentioned step-and-shoot acquisition to continuous bed motion (without overlap) equals a table speed of ~2.2 mm/s.

**EARL1: PSF TOF 4i5s m220 G7**

| Activity (MBq/kg)/Duration (s) |              | 15 | 30 | 60 | 120 | 300 |
|--------------------------------|--------------|----|----|----|-----|-----|
| <b>T0</b>                      | 4 MBq/kg     | 14 | 10 | 9  | 7   | 4   |
| <b>T0+1h</b>                   | 2,73 MBq/kg  | 15 | 11 | 9  | 7   | 4   |
| <b>T0+2h</b>                   | 1,87 MBq/kg  | 18 | 13 | 10 | 8   | 5   |
| <b>T0+3h</b>                   | 1,29 MBq/kg  | 22 | 16 | 11 | 8   | 6   |
| <b>T0+4h</b>                   | 0,88 MBq/kg* | 26 | 19 | 14 | 10  | 7   |
| <b>T0+5h</b>                   | 0,56 MBq/kg  | 32 | 26 | 18 | 13  | 8   |
| <b>T0+6h</b>                   | 0,41 MBq/kg  | 37 | 30 | 21 | 15  | 10  |

\*For scanning 1 min per bed position on the Vision, FDG administration can be decreased by a factor ~8

Table 2 – Following the standard operating procedure “EARL procedure for assessing PET/CT system specific patient FDG activity preparations for quantitative FDG PET/CT studies” (23) results were obtained for 15, 30, 60, 120, and 300 s of scan time, respectively, using the EARL2 reconstruction with 4 iterations, 5 subsets, a matrix size of 220, applying PSF and TOF, and a Gaussian filter of 5 mm. Results indicated in green represent Coefficient of Variance values of <15%. The corresponding activity dose and scan duration provide a first insight in applicable activity dose and scan duration for clinical practice.

| EARL2: PSF TOF 4i5s m220 G5    |              |    |    |    |     |     |
|--------------------------------|--------------|----|----|----|-----|-----|
| Activity (MBq/kg)/Duration (s) |              | 15 | 30 | 60 | 120 | 300 |
| T0                             | 4 MBq/kg     | 20 | 14 | 10 | 7   | 5   |
| T0+1h                          | 2,73 MBq/kg  | 22 | 17 | 12 | 9   | 6   |
| T0+2h                          | 1,87 MBq/kg* | 26 | 20 | 14 | 11  | 7   |
| T0+3h                          | 1,29 MBq/kg  | 33 | 24 | 16 | 11  | 8   |
| T0+4h                          | 0,88 MBq/kg  | 42 | 29 | 21 | 15  | 10  |
| T0+5h                          | 0,56 MBq/kg  | 48 | 38 | 26 | 18  | 12  |
| T0+6h                          | 0,41 MBq/kg  | 56 | 43 | 29 | 22  | 13  |

\*For scanning 1 min per bed position on the Vision, FDG administration can be decreased by a factor ~4

Table 3 – Following the standard operating procedure “EARL procedure for assessing PET/CT system specific patient FDG activity preparations for quantitative FDG PET/CT studies” (23) results were obtained for 15, 30, 60, 120, and 300 s of scan time, respectively, using the vendor recommended reconstruction protocol with 4 iterations, 5 subsets, a matrix size of 440, applying PSF and TOF. Results indicated in green represent Coefficient of Variance values of <15%. The corresponding activity dose and scan duration provide a first insight in applicable activity dose and scan duration for clinical practice.

| <b>Vendor recommended: PSF TOF 4i5s m440 ap</b> |             |           |           |           |            |            |
|-------------------------------------------------|-------------|-----------|-----------|-----------|------------|------------|
| <b>Activity (MBq/kg)/Duration (s)</b>           |             | <b>15</b> | <b>30</b> | <b>60</b> | <b>120</b> | <b>300</b> |
| <b>T0</b>                                       | 4 MBq/kg    | 52        | 35        | 25        | 18         | 11         |
| <b>T0+1h</b>                                    | 2,73 MBq/kg | 61        | 44        | 31        | 23         | 14         |
| <b>T0+2h</b>                                    | 1,87 MBq/kg | 76        | 53        | 37        | 27         | 17         |
| <b>T0+3h</b>                                    | 1,29 MBq/kg | 87        | 63        | 43        | 31         | 20         |
| <b>T0+4h</b>                                    | 0,88 MBq/kg | 119       | 84        | 59        | 39         | 24         |
| <b>T0+5h</b>                                    | 0,56 MBq/kg | 138       | 97        | 64        | 45         | 28         |
| <b>T0+6h</b>                                    | 0,41 MBq/kg | 166       | 114       | 77        | 56         | 35         |

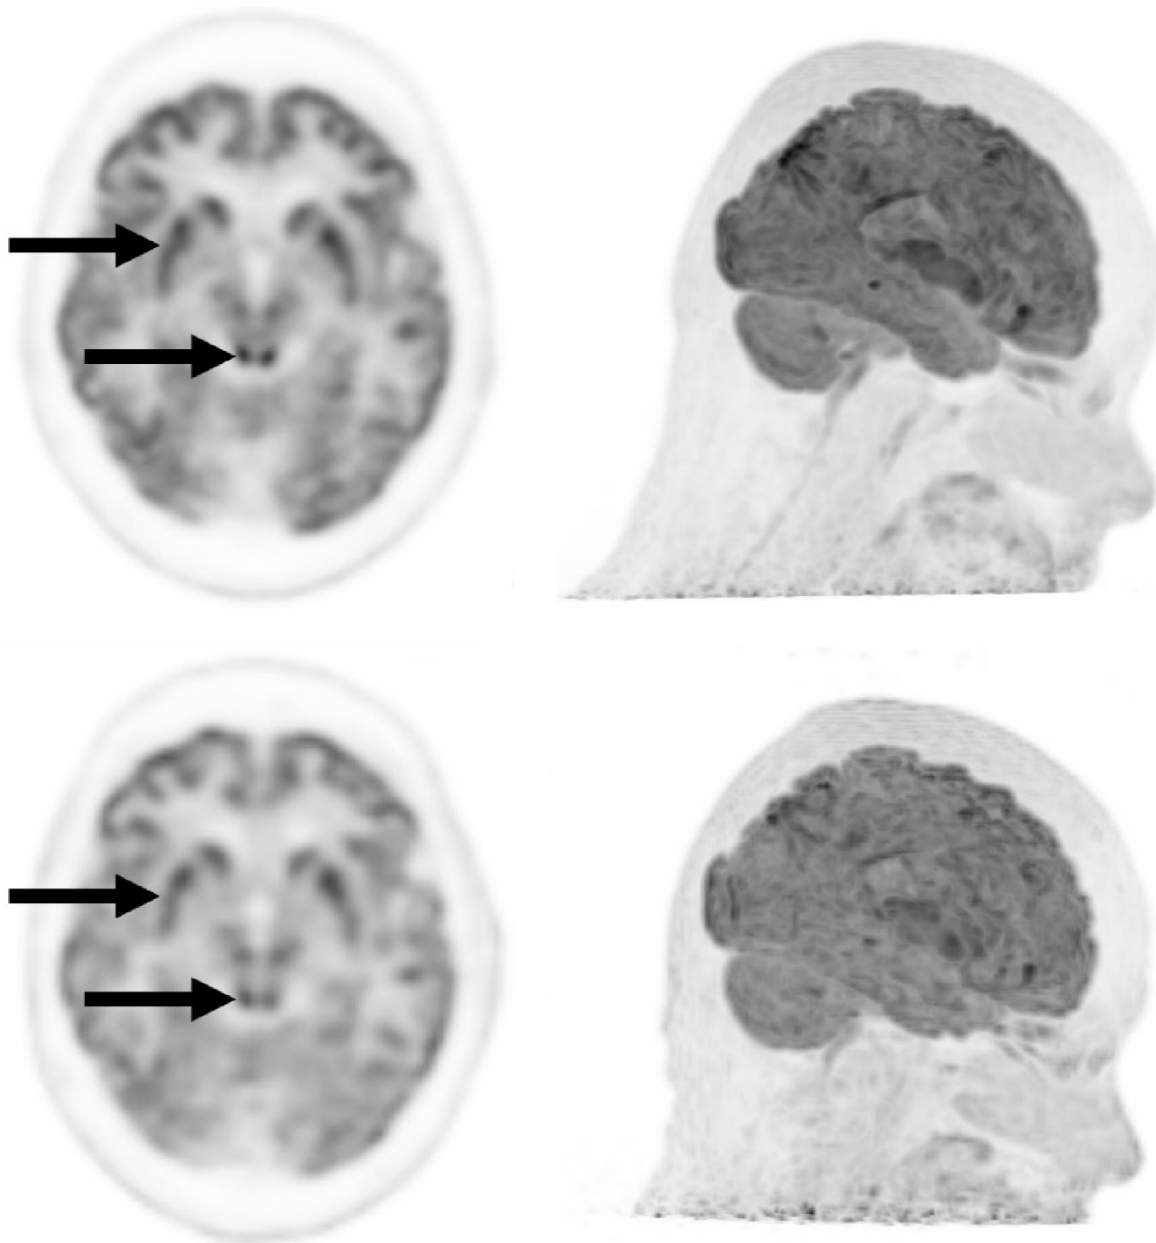

Supplemental Figure 3 – Brain images acquired on the Biograph Vision (upper row) and images acquired on the Biograph mCT (lower row). Data acquired on the Vision were reconstructed using TOF OP-OSEM with 8 iterations and 5 subsets, with resolution modelling into a 440x440 matrix with a size of 1.6x1.6x1.6 mm. Data from the mCT were reconstructing using TOF OP-OSEM with 6 iterations, 21 subsets, and resolution modelling. The resulting image size was 400x400 with a voxel size of 2x2x2 mm. For both reconstruction protocols, no filter was used. The black arrows indicate the striatum and thalamus.

In the images acquired on the Vision a more clear demarcation of the striatum and thalamus can be observed.

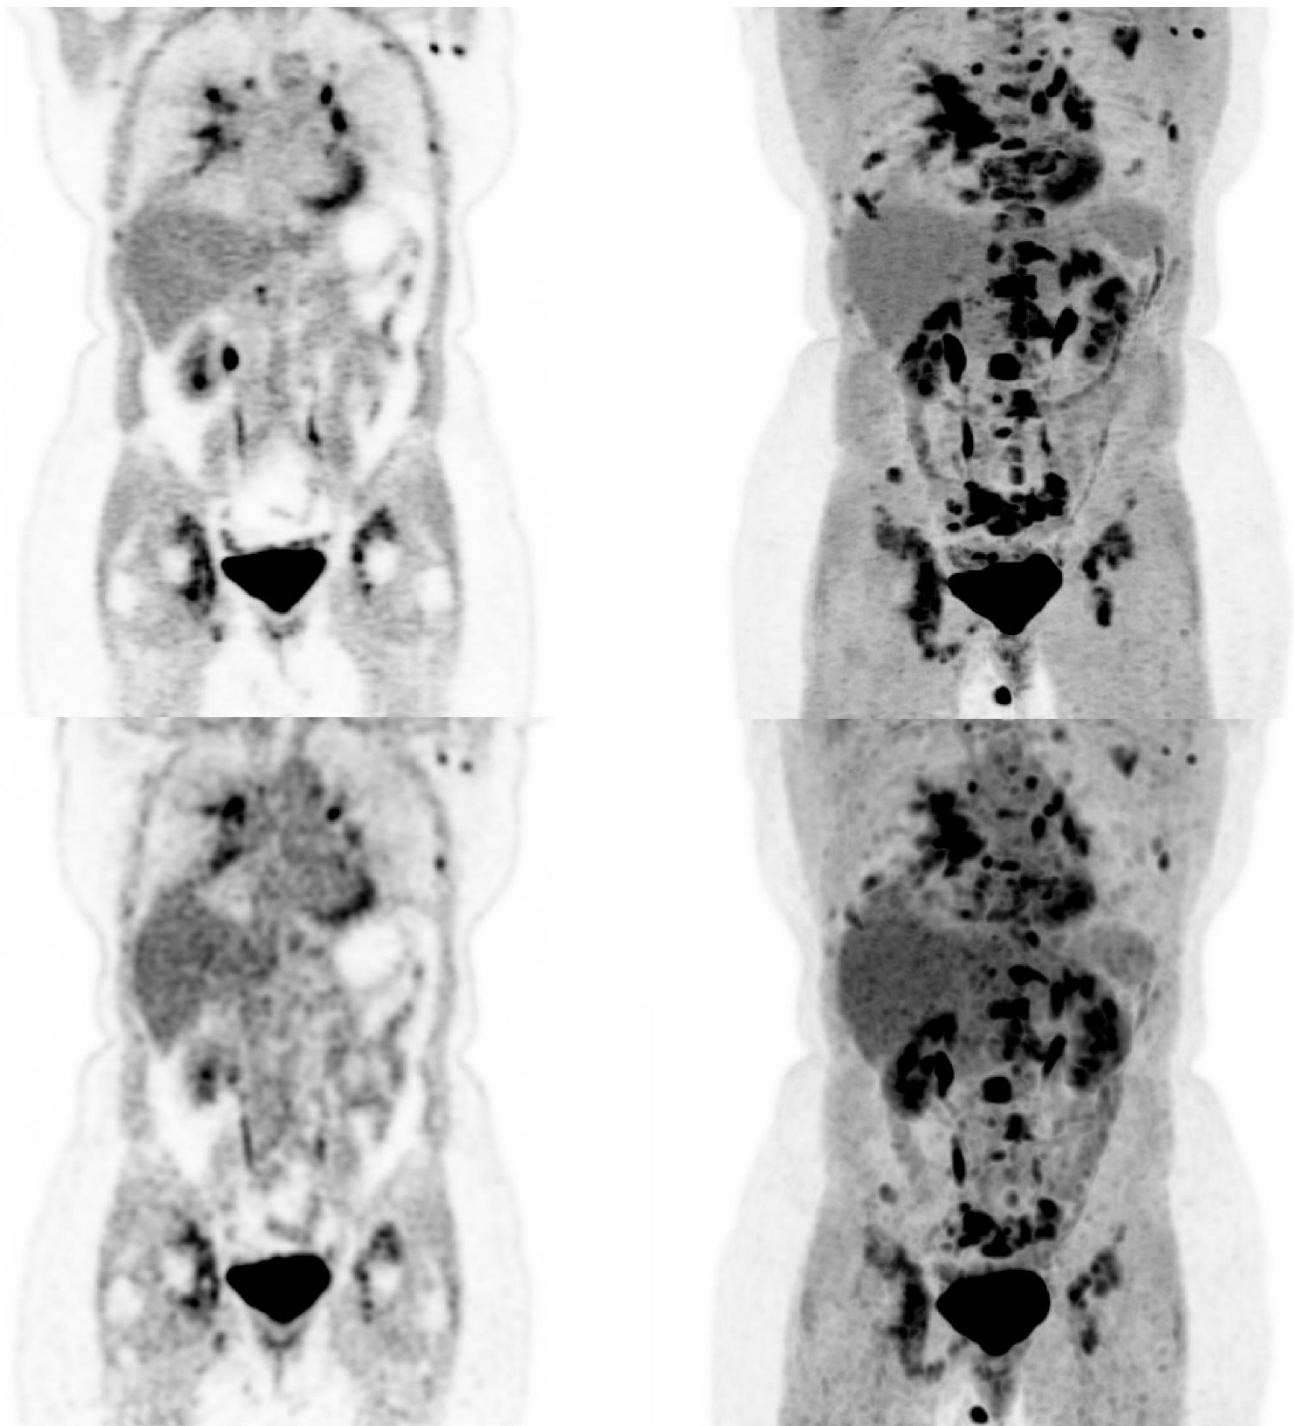

Supplemental Figure 4 – Illustrative coronal images acquired on the Biograph Vision (upper row) and acquired on the Biograph mCT (lower row) of a 56-year old female patient with metastasized Non-Small Cell Lung Carcinoma. On visual inspection, the difference in tissue structures is more clearly defined in images obtained from the new digital Biograph Vision.

It should be noted that a 2 mm Gaussian filter was applied on the images acquired on the Biograph mCT in contrast to the images acquired on the Biograph Vision. Also, an approximate 20-30 longer uptake time applies to the scans performed on the Biograph Vision in comparison to the scans performed on the Biograph mCT system. These differences in reconstruction and  $^{18}\text{F}$ -FDG uptake time may result in relatively small differences in image quality.
